# Supplementary material
Source: MDPI journal article supplement (https://www.mdpi.com/2076-3417/11/24/12089)
Supplement: s1 [file s1 › applsci-1468211-supplementary.pdf]

# **Asthma control during COVID-19 lockdown in patients with severe asthma under biological drug treatment**

## ***Supplement material: Telephone survey***

Considering the 6 months after 9<sup>th</sup> March 2020, when the lockdown policy related to COVID-19 pandemic was established:

- How many lung function tests have you had?
- How many blood tests have you had?
- How many clinical examinations have you had?
- How many hospital admissions have you had?
- How many accesses to emergency department have you had?
- How many asthma exacerbations have you had?
- How many biologic drug administrations at hospital setting have you had?
- How many biologic drug administrations at general practitioner's office have you had?
- How many biologic drug self-administrations at home have you had?

Then, Asthma Control Test was administered by telephone.

Data related to pre-pandemic period were retrieved from medical records of Respiratory Unit of Magna Graecia University Hospital in Catanzaro (Italy).
